# Supplementary material for: Long-read single-molecule maps of the functional methylome
Source: PubMed Central journal article supplement (PMC6442387; doi:10.1101/gr.240739.118), 2019-04

# Estimation of modification efficiency by comparison to simulated fragmentation profiles

|    |            |    |      |      |     |     |  |      |      |      |      |      |                                      |
|----|------------|----|------|------|-----|-----|--|------|------|------|------|------|--------------------------------------|
| 1. | M.SssI     | 0  | 1:32 | 1:16 | 1:8 | 1:4 |  | 0    | 1:32 | 1:16 | 1:8  | 1:4  | ratio enzyme per site                |
|    | AdoMet     | 0  | 20   | 20   | 20  | 20  |  | 0    | 20   | 20   | 20   | 20   | concentration in $\mu\text{M}$       |
| 2. | M.TaqI     |    |      |      |     |     |  | 1:20 | 1:20 | 1:20 | 1:20 | 1:20 | ratio enzyme per site                |
|    | AdoYnTAMRA |    |      |      |     |     |  | 40   | 40   | 40   | 40   | 40   | concentration in $\mu\text{M}$       |
| 3. | R.BstUI    | 10 | 10   | 10   | 10  | 10  |  |      |      |      |      |      | units per $\mu\text{g } \lambda$ DNA |
|    | R.TaqI     |    |      |      |     |     |  | 10   | 10   | 10   | 10   | 10   | units per $\mu\text{g } \lambda$ DNA |

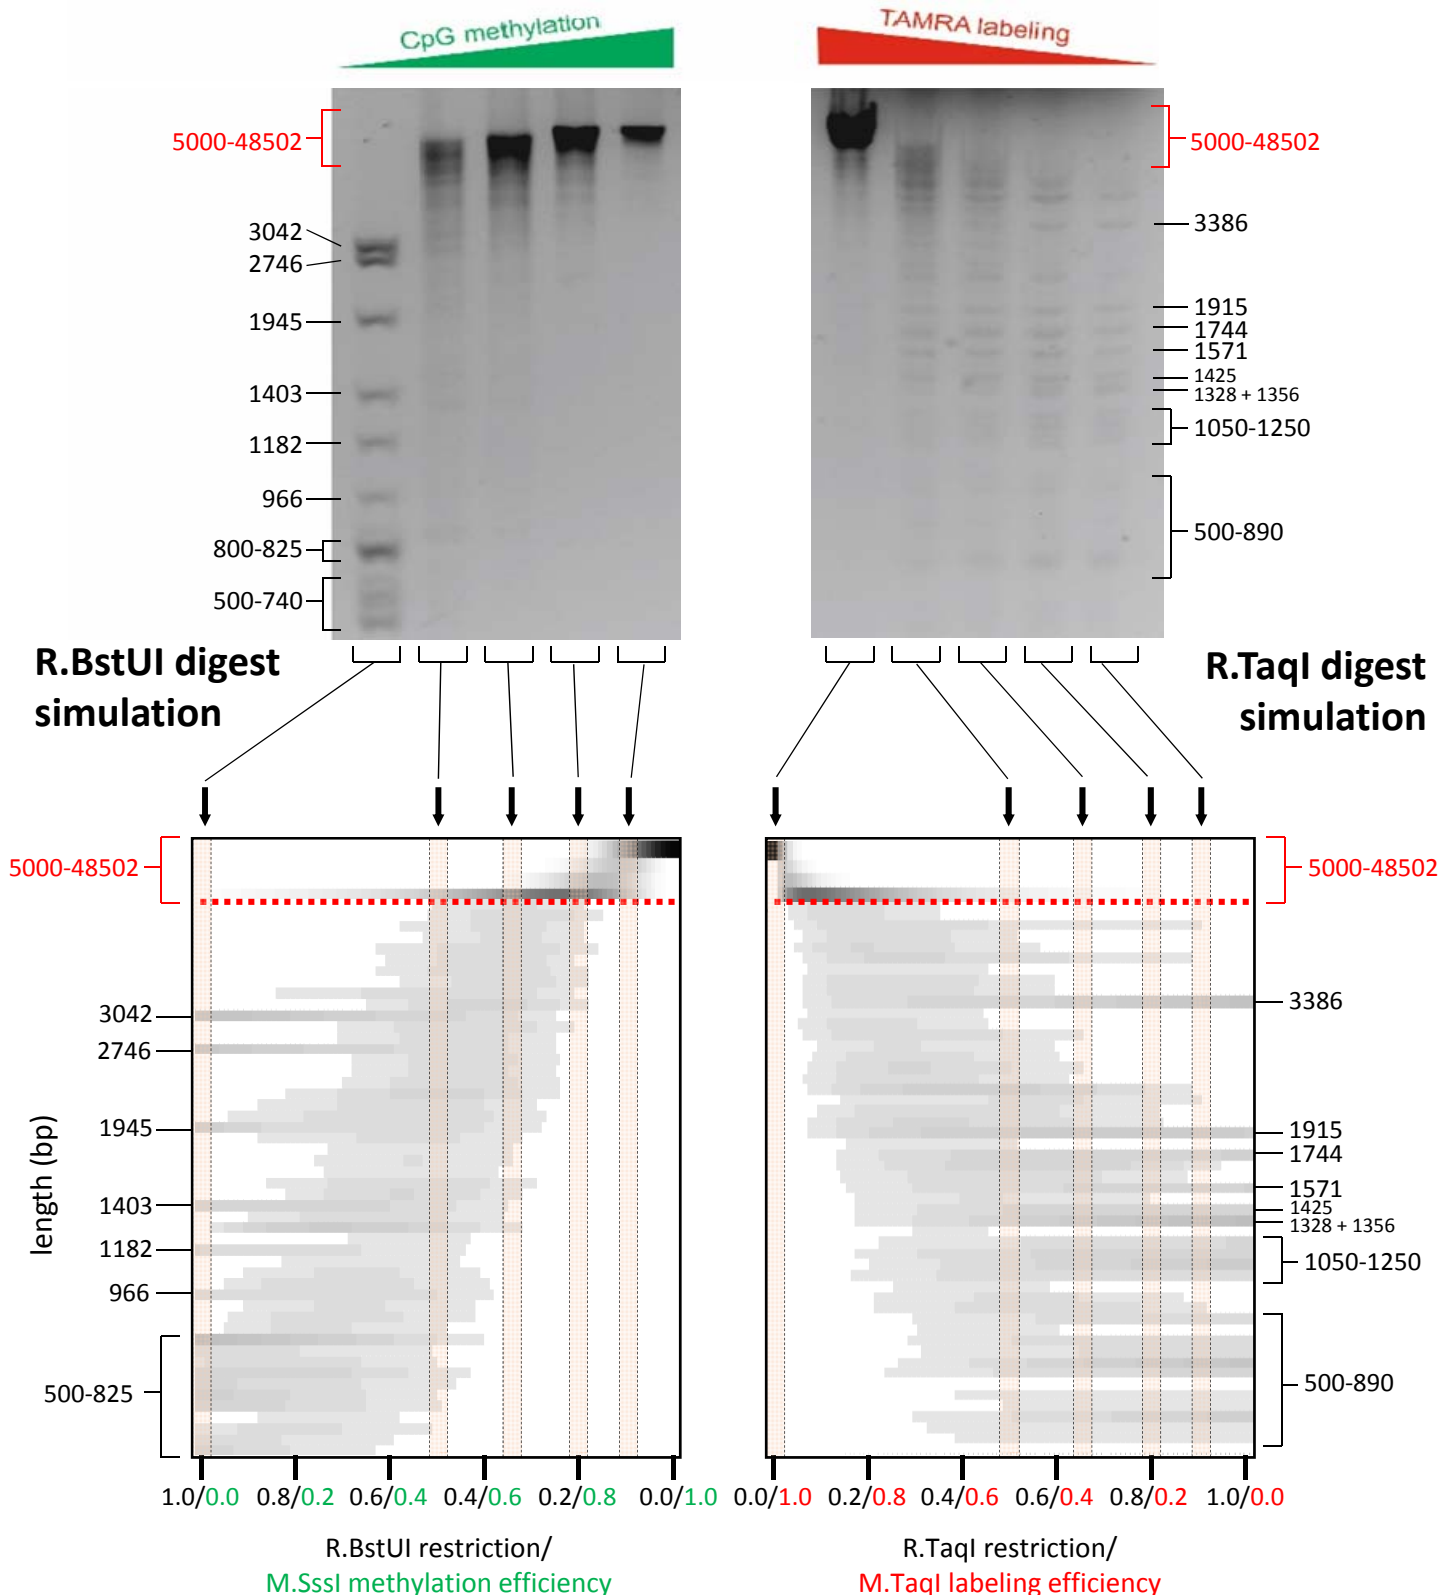

Supplement: supp_gr.240739.118_Supplemental_File_2.pdf [file supp_gr.240739.118_Supplemental_File_2.pdf]
